# Supplementary material
Source: HighWire-hosted journal article supplement (https://www.cmaj.ca/highwire/filestream/147464/field_highwire_adjunct_files/0/212142-res-1-at.pdf)
Supplement: 212142-res-1-at.pdf [file 212142-res-1-at.pdf]

**Title: Factors that Contribute to the Mental Health of Black Youths**

**Appendix 1: Interview Guide**

- Can you describe what the term *mental health* means to you?
  - Probe: compared to physical health, compared to mental illness
- Can you describe an experience(s) that had a positive impact on your mental health?
- Can you describe an experience(s) that had a negative mental health impact on you?
- What are the (specific) challenges that you experience in your community regarding staying mentally healthy?
- What strengths do you think African, Black, and Caribbean youths have that might help improve mental health for them?
- Imagine a community that supports youths' mental health? Describe it for me...
- If you could ask for anything to better your mental health, what would you ask for
  - from people in your community who work with youths?
  - from your family?
  - from your school?
  - from service providers?
  - from politicians?

Please provide any additional comments.
